# Supplementary material for: N-Doped HNT/TiO2 Nanocomposite by Electrospinning for Acetaminophen Degradation
Source: MDPI journal article supplement (doi:10.3390/membranes13020204), 2023-02-07
Supplement: s1 [file s1]

Supporting information

## N-Doped HNT/TiO<sub>2</sub> Nanocomposite by Electrospinning for Acetaminophen Degradation

Mahmoud Abid <sup>1,2</sup>, Elissa Makhoul <sup>1</sup>, Fida Tanos <sup>1</sup>, Igor Iatsunskyi <sup>3</sup>, Emerson Coy <sup>3</sup>,  
Geoffroy Lesage <sup>1</sup>, Marc Cretin <sup>1</sup>, David Cornu <sup>1,\*</sup>, Abdesslem Ben Haj Amara <sup>1,†</sup>  
and Mikhael Bechelany <sup>1,\*,†</sup>

<sup>1</sup> Institut Européen des Membranes, IEM, UMR 5635, Univ Montpellier, ENSCM, CNRS, 34730 Montpellier, France

<sup>2</sup> Laboratory of Resources, Materials & Ecosystem (RME), Faculty of Sciences of Bizerte, University of Carthage, Zarzouna 7021, Tunisia

<sup>3</sup> NanoBioMedical Centre, Adam Mickiewicz University, Wszechnicy Piastowskiej 3, 61-614 Poznan, Poland

\* Correspondence: david.cornu@umontpellier.fr (D.C.); mikhael.bechelany@umontpellier.fr (M.B.)

† These authors contributed equally to this work.

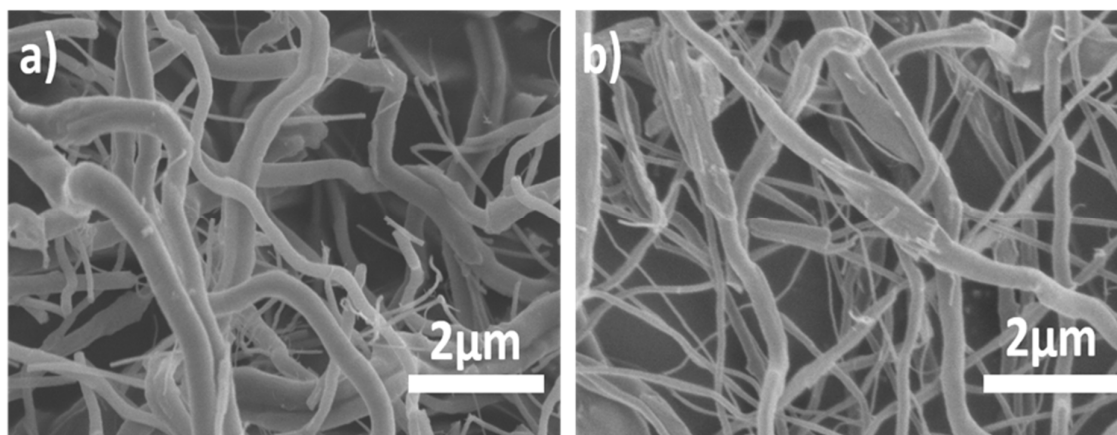

**Figure S1. SEM micrographs showing H95T5 (a) and N-H95T5 nanocomposite fibers (b).**

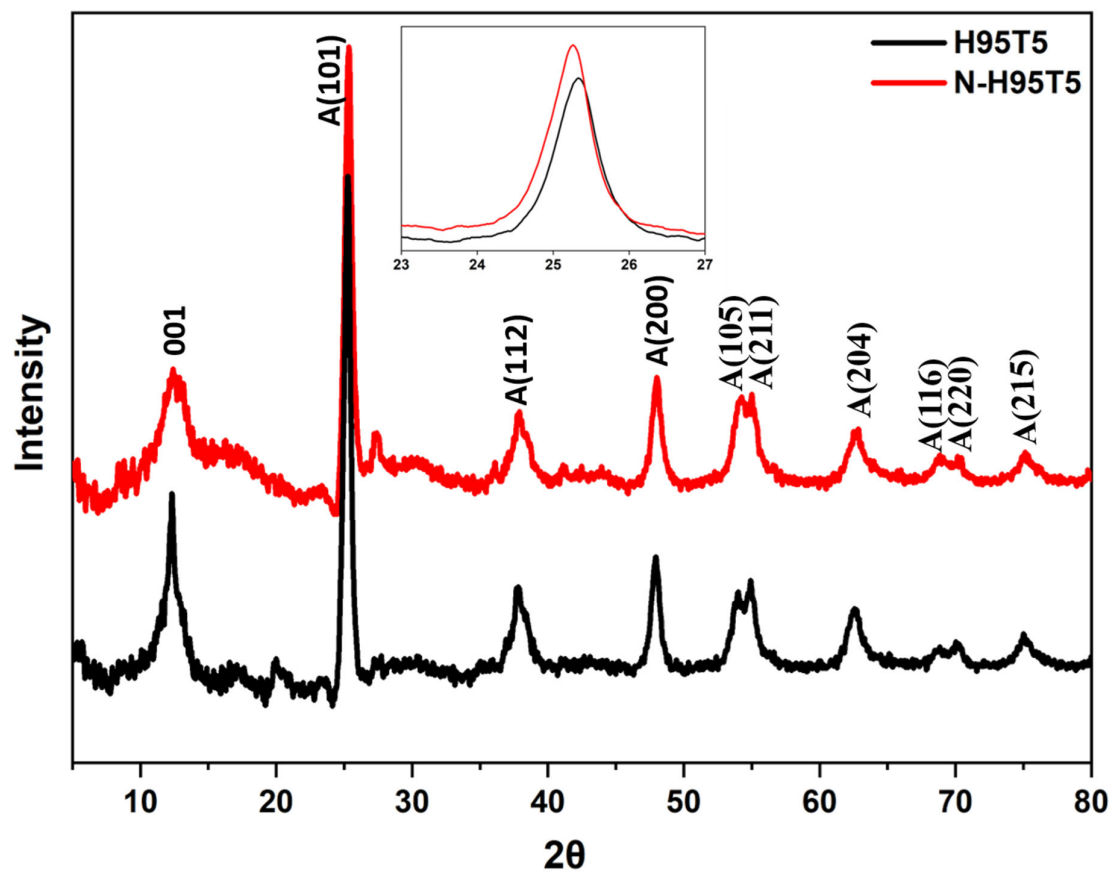

Figure S2. XRD patterns of H95T5 and N-H95T5 nanocomposite fibers.

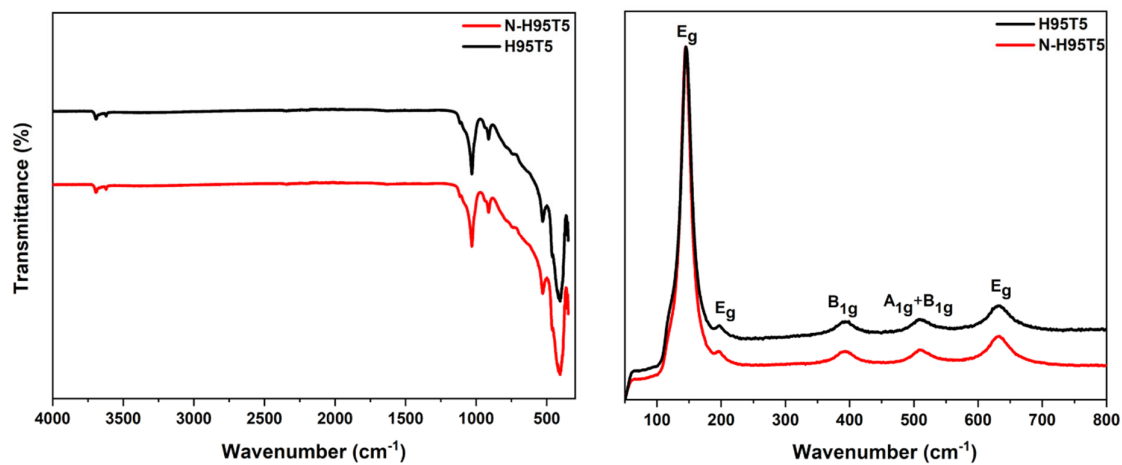

Figure S3. FT-IR spectra (a) and Raman spectra (b) of H95T5 and N-H95T5 nanofibers

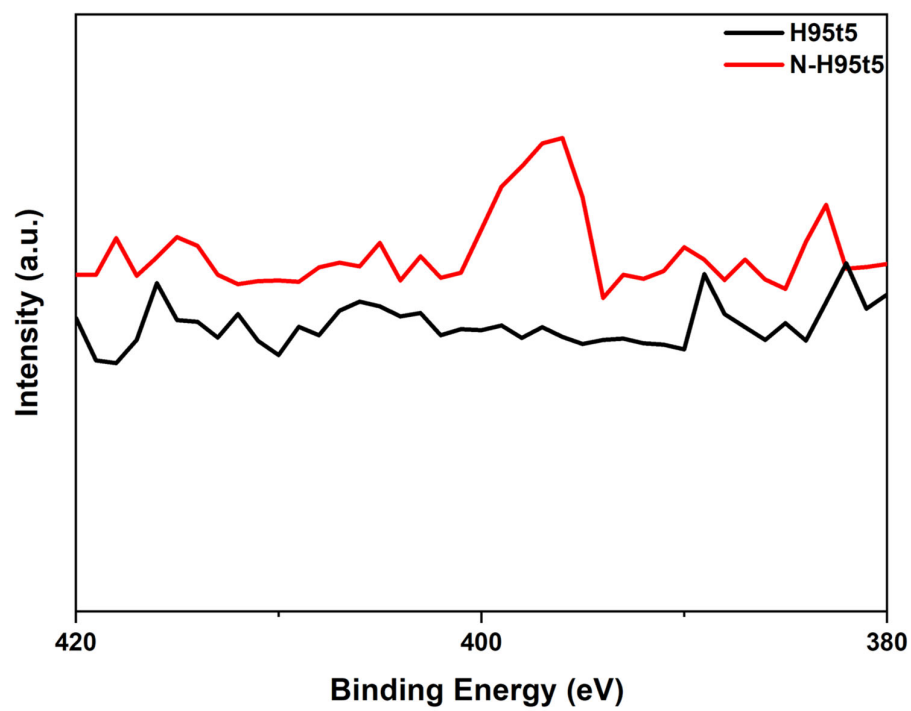

Figure S4. XPS survey spectra of H95T5 and N-H95T5 from 420 to 380 eV
